# Supplementary material for: Association and clinical utility of NAT2 in the prediction of isoniazid-induced liver injury in Singaporean patients
Source: PubMed Central journal article supplement (PMC5642896; doi:10.1371/journal.pone.0186200), 2017-10-16

## CASES

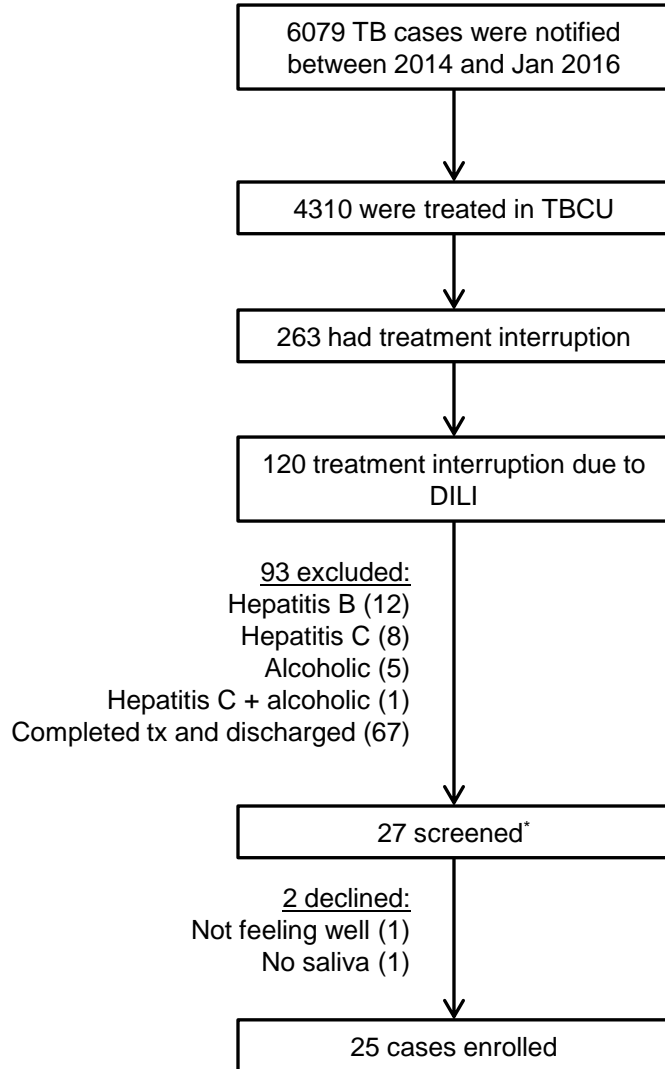

## CONTROLS

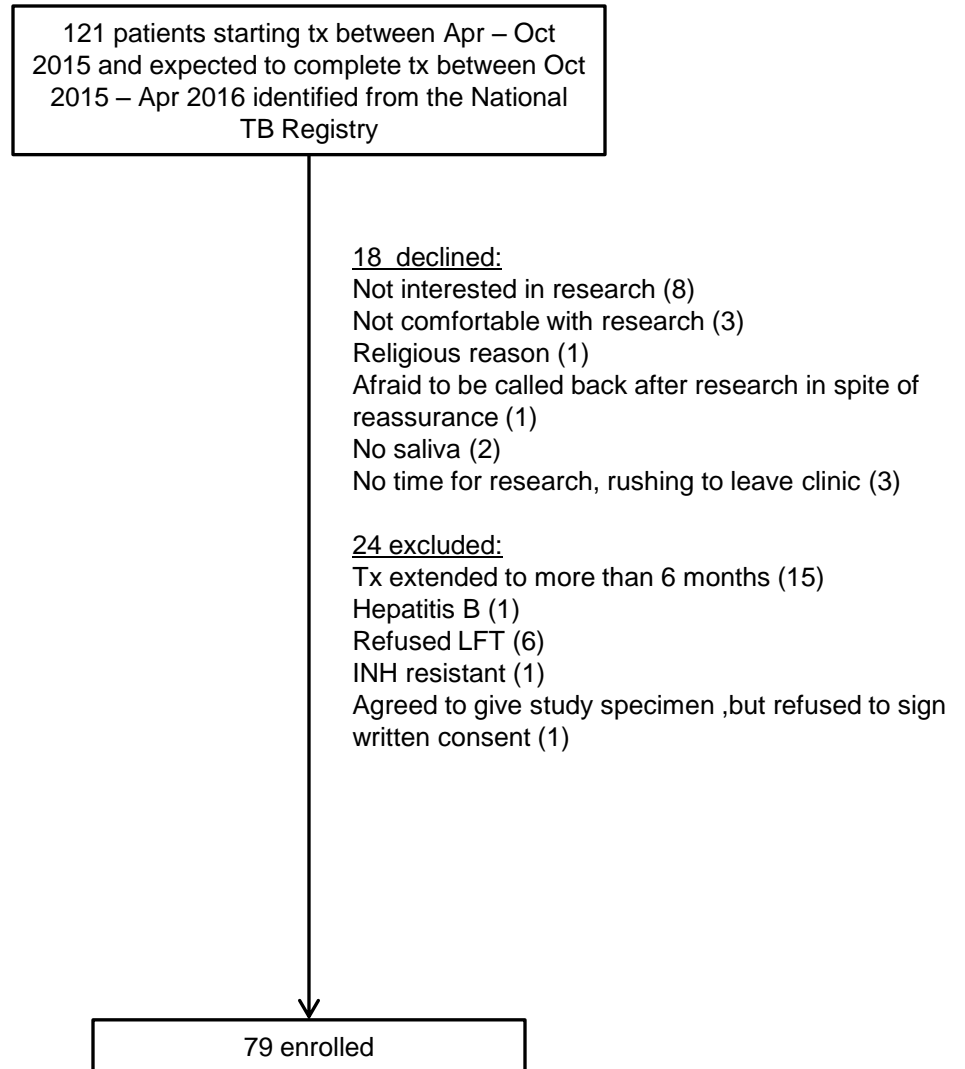

Supplement: pone.0186200.s001.pdf [file pone.0186200.s001.pdf]
